# Supplementary material for: Engineering phytosterol-based oleogels for potential application as sustainable petrolatum replacement
Source: Royal Society of Chemistry journal article supplement (doi:10.1039/c9ra06950j), 2019-12-24
Supplement: c9ra06950j1.pdf [file c9ra06950j1.pdf]

## Supporting Information (SI)

### Engineering Phytosterol-based Oleogels for Potential Application as Sustainable Petrolatum Replacement

Xiao-Wei Chen,<sup>a\*</sup> Shang-De Sun,<sup>a</sup> Guo-Long Yang,<sup>a</sup> and Chuan-Guo Ma<sup>ab\*</sup>

<sup>a</sup> Lipid Technology and Engineering, School of Food Science and Engineering, Henan University of Technology, Lianhua Road 100, Zhengzhou 450001, Henan Province, PR China

<sup>b</sup> National Engineering Laboratory for Wheat & Corn Further Processing, Henan University of Technology, Lianhua Road 100, Zhengzhou 450001, Henan Province, PR China

**Running title:** Engineering Phytosterol-based Oleogels in Edible Oils

**Corresponding to:**

Tel/fax: (086)371-67758022.

**Xiao-Wei Chen:**

E-mail address: [chenxiaowei8252@hotmail.com](mailto:chenxiaowei8252@hotmail.com); ORCID: 0000-0003-4564-5120

**Chuan-Guo Ma:**

E-mail address: [mcg@haut.edu.cn](mailto:mcg@haut.edu.cn) (C.-G. Ma)

**Table S.** fatty acid combination of the edible oils (sunflower oil, olive oil, algae oil, corn oil, soybean oil) used in the work.

| Fatty acids                   | Olive oil  | Algae oil  | Soybean oil   | Corn oil    | Sunflower oil |
|-------------------------------|------------|------------|---------------|-------------|---------------|
| Myristic C <sub>14:0</sub>    | 0.01±0.01  | 2.63±0.11  | — <i>n.d.</i> | 0.04±0.01   | —             |
| Palmitic C <sub>16:0</sub>    | 13.45±0.34 | 37.13±0.52 | 10.5±0.1      | 13.28±0.82  | 6.17±0.00     |
| Stearic C <sub>18:0</sub>     | 2.23±0.22  | 1.29±0.03  | 4.5±0.1       | 1.75±0.33   | 3.51±0.01     |
| Oleic C <sub>18:1</sub>       | 73±1       | 0.59±0.01  | 56.47±0.81    | 31.21±0.032 | 27.53±0.35    |
| Linoleic C <sub>18:2</sub>    | 10.88±0.09 | 0.62±0.02  | 20.00±0.24    | 52.08±0.91  | 61.47±0.18    |
| Linolenic C <sub>18:3</sub>   | 0.89±0.04  | 0.31±0.02  | 7.7±0.1       | 1.2±0.1     | —             |
| Arachidic C <sub>20:0</sub>   | 0.33±0.03  | —          | 0.35±0.05     | 0.35±0.06   | 0.25±0.00     |
| Eicosenoic C <sub>20:1</sub>  | 0.28±0.01  | —          | 0.24±0.03     | —           | 0.19±0.00     |
| Arachidonic C <sub>20:4</sub> | —          | 0.09±0.01  | —             | —           | —             |
| Behenic C <sub>22:0</sub>     | 0.08±0.01  | —          | 0.34±0.00     | —           | 0.49±0.37     |
| DPA C <sub>22:5</sub>         | —          | 9.53±0.51  | —             | —           | —             |
| DHAC <sub>22:6</sub>          | —          | 41.27±1.23 | —             | —           | —             |

Values are mean ± standard deviation. *n.d.* not detected (< LOD).

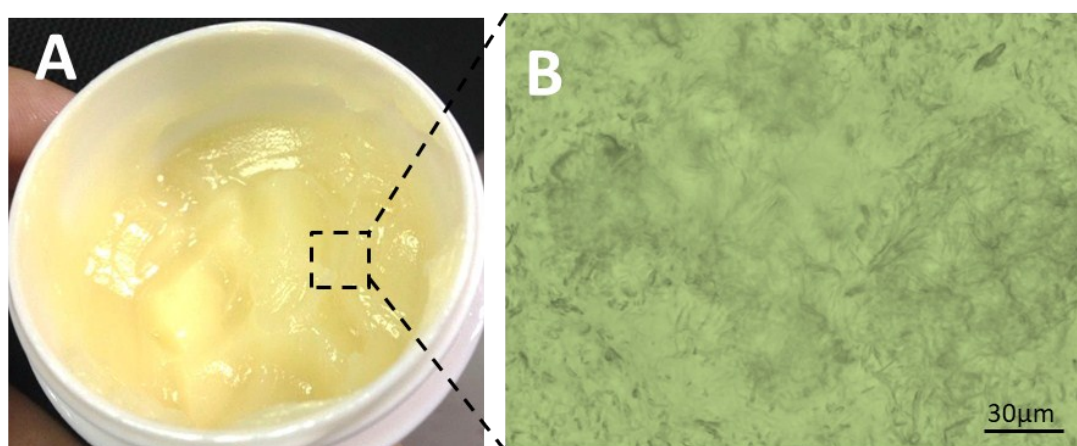

**Fig. S1** Appearance (A) and optical microscopy (B) of a commercial petrolatum product.

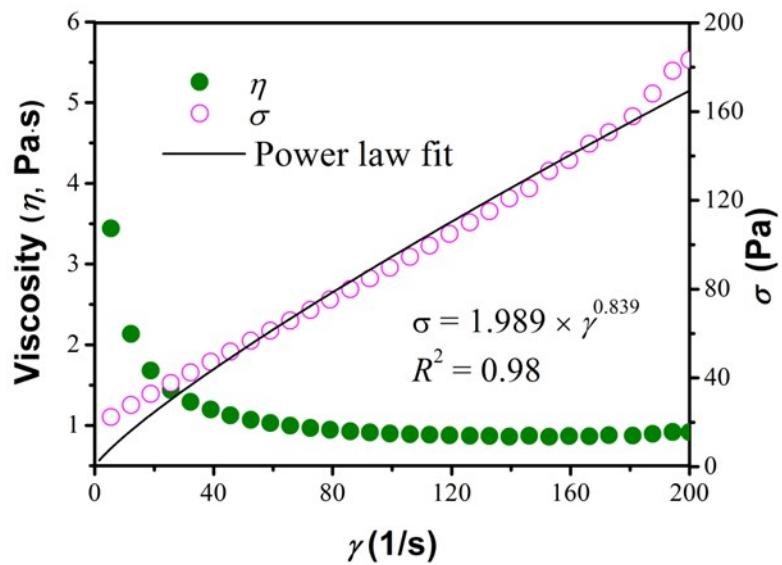

**Fig. S2.** Viscosity and shear stress with power law fit of a commercial petrolatum product.
